# Supplementary material
Source: PubMed Central journal article supplement (PMC1458631)
Supplement: pnas_0511061103_6.pdf [file pnas_0511061103_6.pdf]

Table 3. Subcellular diffusion time constants

| Parameter | Definition                                           | Value  |
|-----------|------------------------------------------------------|--------|
| $\tau_s$  | Submembrane diffusion time constant                  | 2 ms   |
| $\tau_i$  | Sarcomere-sarcomere myoplasm diffusion time constant | 5 ms   |
| $\tau_j$  | Sarcomere-sarcomere SR diffusion time constant       | 100 ms |
