# Supplementary material
Source: PubMed Central journal article supplement (PMC1458631)
Supplement: pnas_0511061103_8.pdf [file pnas_0511061103_8.pdf]

Table 5. Exchanger and uptake parameters

| Parameter         | Definition            | Value                        |
|-------------------|-----------------------|------------------------------|
| $c_{\text{up}}$   | Uptake threshold      | 0.5 $\mu\text{M}$            |
| $v_{\text{up}}$   | Uptake strength       | 250 $\mu\text{M}$            |
| $g_{\text{NaCa}}$ | Strength of exchanger | 9,000 $\mu\text{M}/\text{s}$ |
| $k_{\text{sat}}$  | Luo-Rudy II constant  | 0.1                          |
| $\xi$             | Luo-Rudy II constant  | 0.35                         |
| $K_{m,\text{Na}}$ | Luo-Rudy II constant  | 87.5 mM                      |
| $K_{m,\text{Ca}}$ | Luo-Rudy II constant  | 1.38 mM                      |
