# Supplementary material
Source: PubMed Central journal article supplement (PMC1458631)
Supplement: pnas_0511061103_9.pdf [file pnas_0511061103_9.pdf]

Table 6. Physical constants and ionic concentrations

| Parameter     | Definition                       | Value                                 |
|---------------|----------------------------------|---------------------------------------|
| $C_m$         | Cell capacitance                 | $1.25 \times 10^{-4} \mu\text{F}$     |
| $F$           | Faraday constant                 | 96,490 C/mol                          |
| $R$           | Universal gas constant           | $8.315 \text{ mol}^{-1}\text{K}^{-1}$ |
| $T$           | Temperature                      | 308 K                                 |
| $[Na^+]_o$    | External sodium concentration    | 140 mM                                |
| $[Na^+]_i$    | Internal sodium concentration    | 10 mM                                 |
| $[K^+]_o$     | External potassium concentration | 4 mM                                  |
| $[K^+]_i$     | Internal potassium concentration | 149.4 mM                              |
| $[Ca^{2+}]_o$ | External calcium concentration   | 1.8 mM                                |
| $v_i$         | Cell volume                      | $25.84 \times 10^{-6} \mu\text{l}$    |
| $v_s$         | Submembrane volume               | $0.1 v_i$                             |
