# Supplementary material
Source: PubMed Central journal article supplement (PMC1458631)

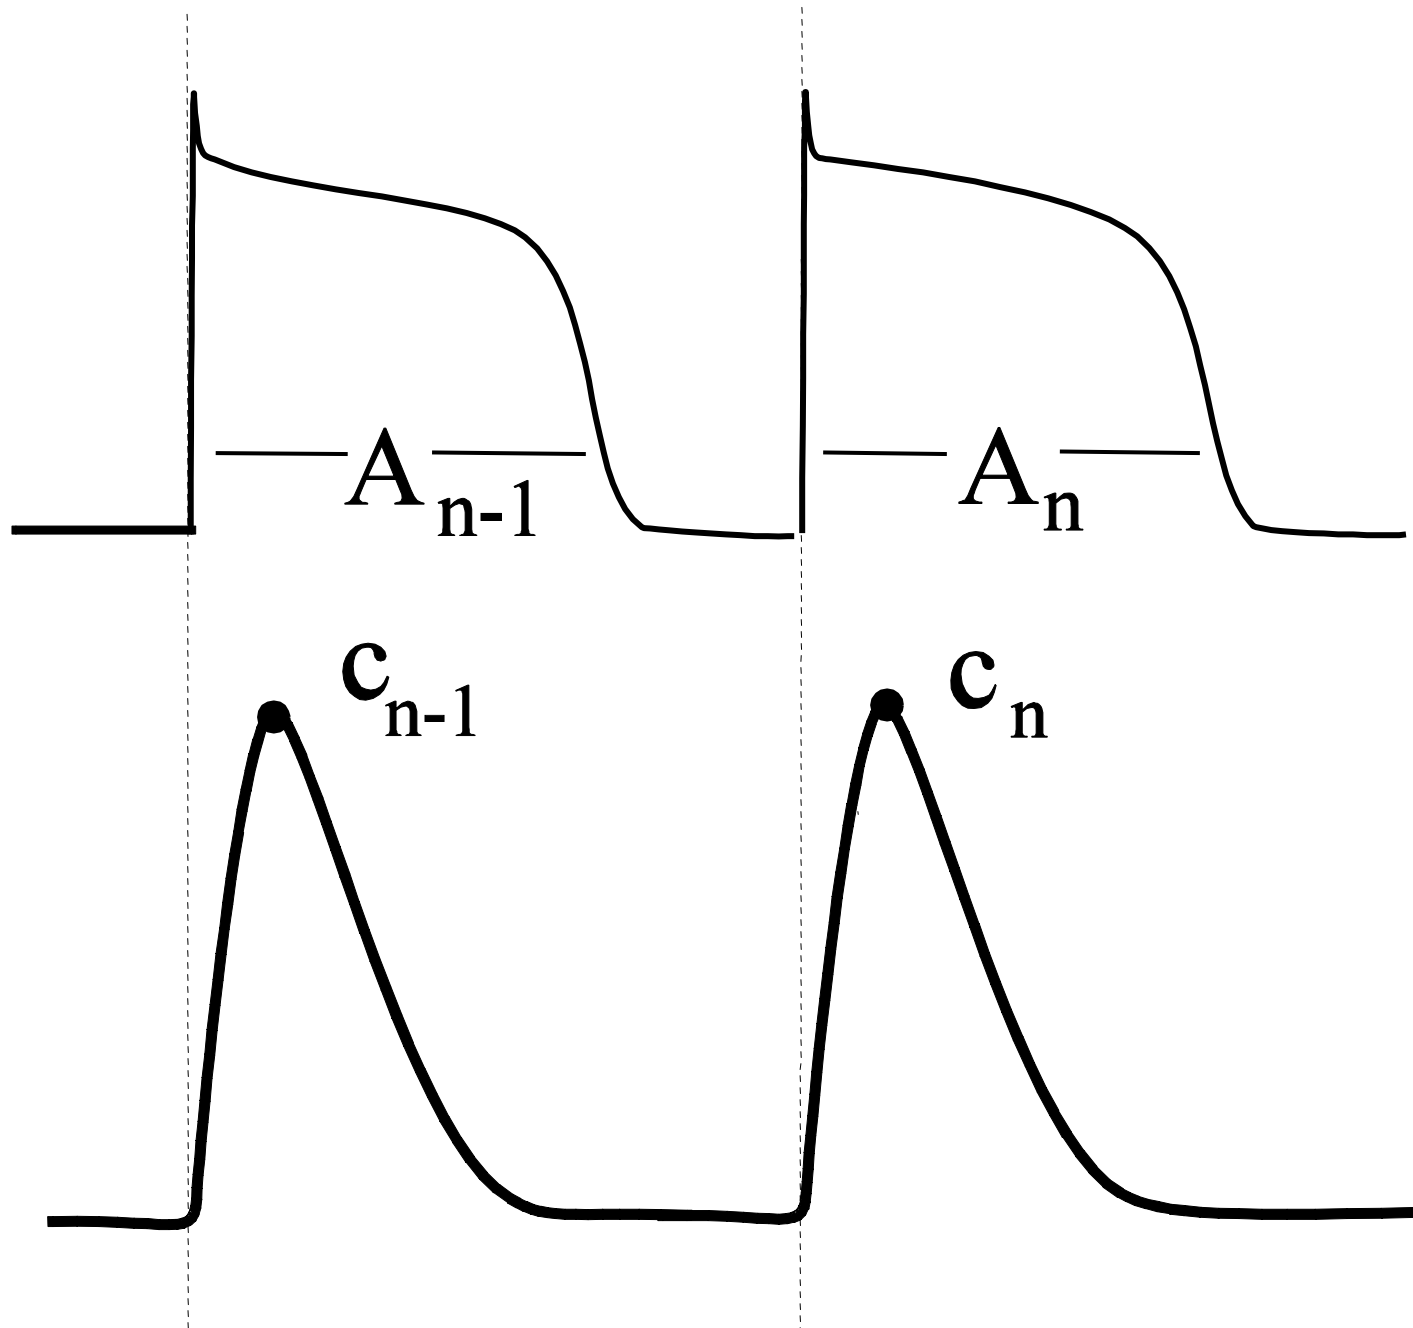

Supplement: pnas_0511061103_1.pdf [file pnas_0511061103_1.pdf]
